# Supplementary material for: Comparing Soil vs. Foliar Nitrogen Supply of the Whole Fertilizer Dose in Common Wheat
Source: MDPI journal article supplement (doi:10.3390/agronomy11112138), 2021-10-26
Supplement: s1 [file s1]

## SUPPLEMENTARY MATERIALS

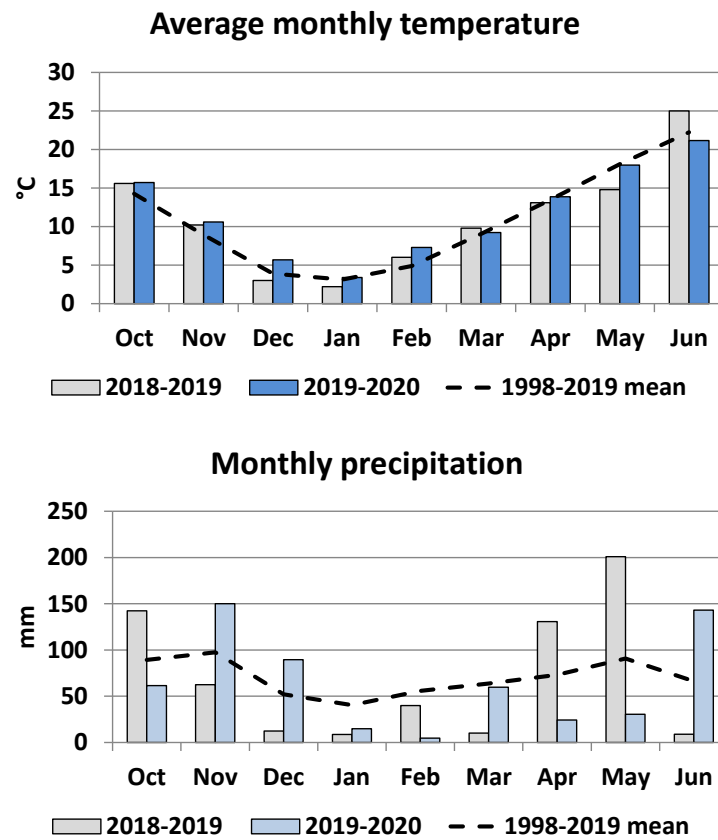

Figure S1. Monthly mean temperatures (A) and precipitations (B) across the two growing cycle of wheat at the experimental farm of the University of Padua (Legnaro, Italy).

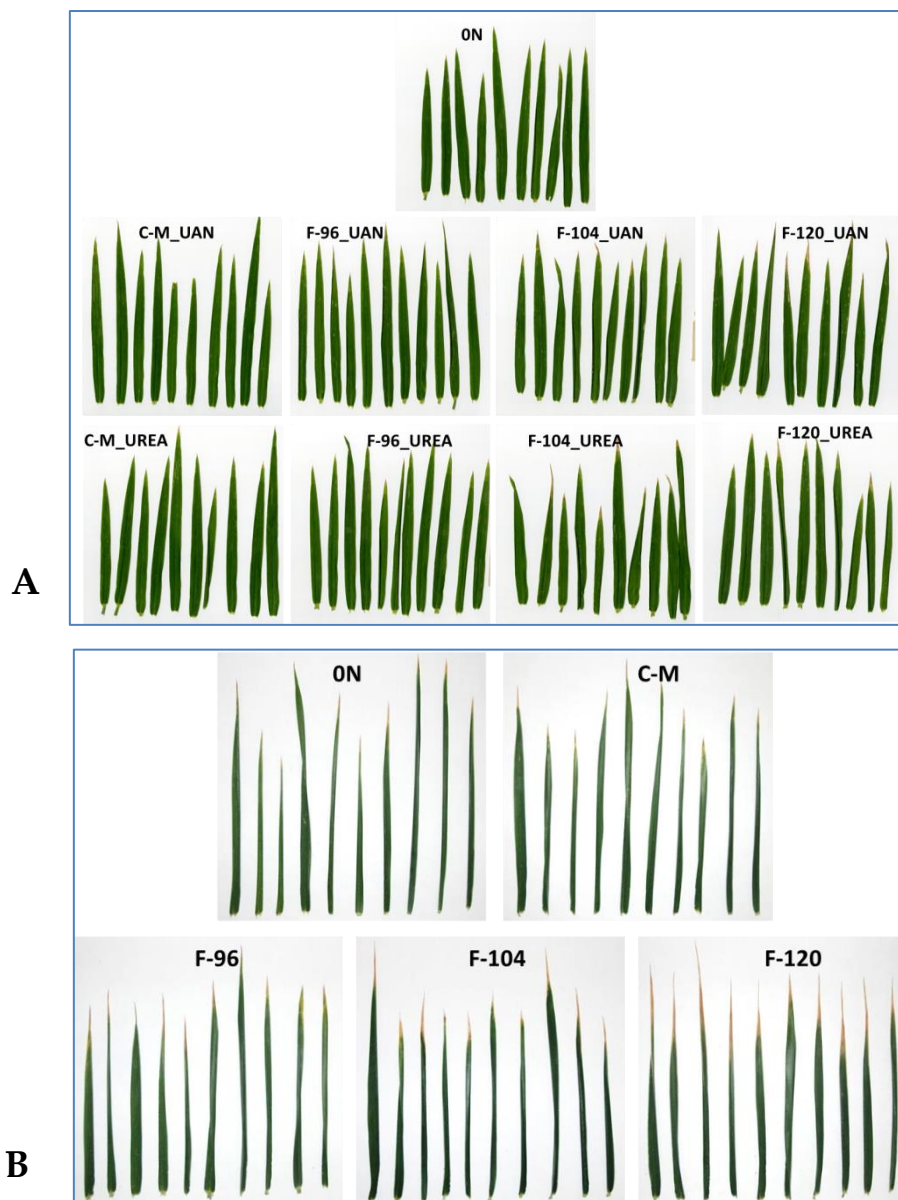

Figure S2. Photographic survey on 10 flag leaves randomly taken from each thesis at 7 days after the last N foliar application (flowering stage) during the 1<sup>st</sup> year (14 May 2019) (A) and 2<sup>nd</sup> year (13 May 2021) (B) trial.

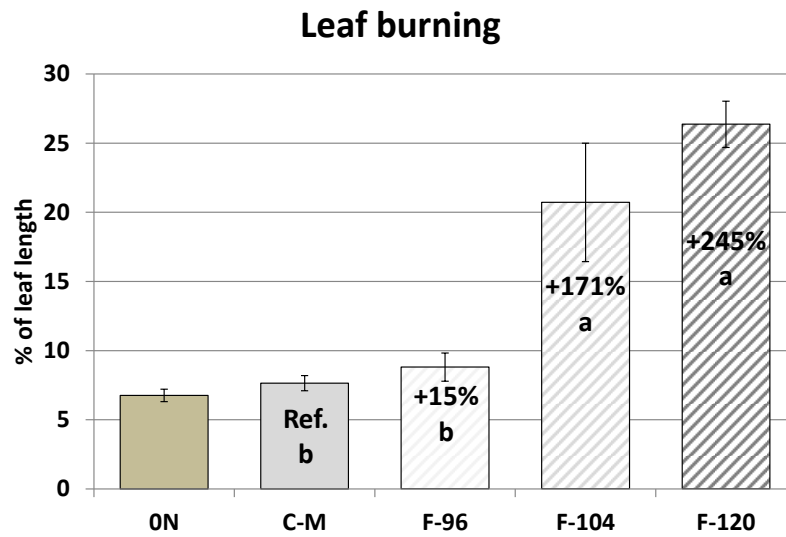

Figure S3. Fraction of burned leaf length ( $\% \pm \text{S.E.}$ ;  $n = 3$ ) in wheat under different foliar N fertilizations in 2019-2020 (2<sup>nd</sup> year) with leaf spraying (F) at various N doses supplied as urea. Inside bars: % variation *vs.* conventional management C-M. Letters: significant differences among treatments (Newman-Keuls test,  $P \leq 0.05$ ).

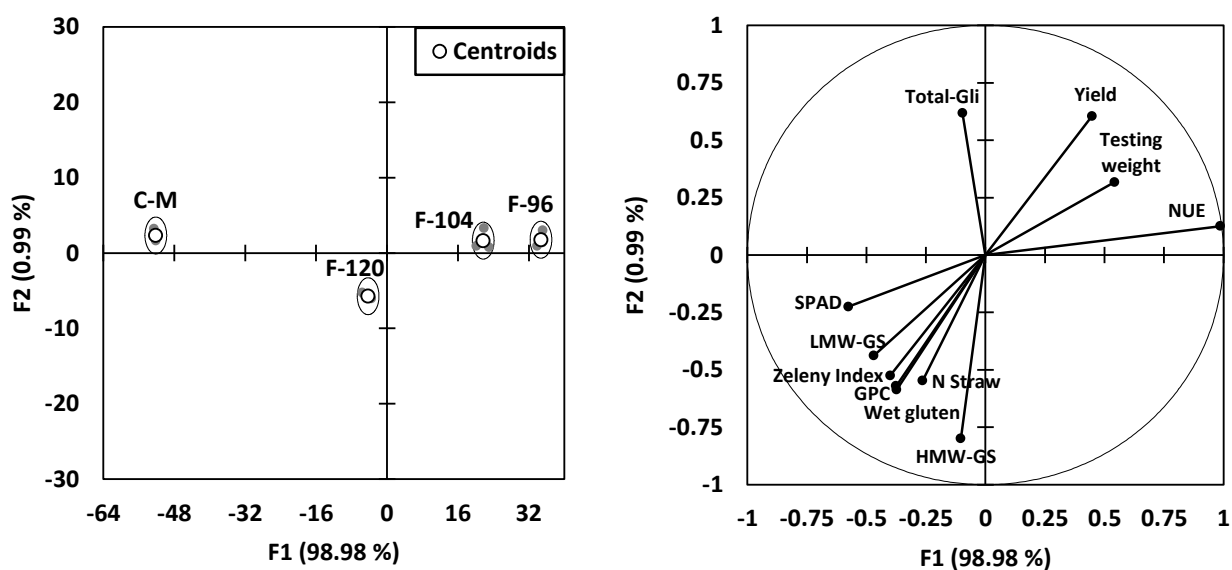

| Variables      | F1     | F2     |
|----------------|--------|--------|
| SPAD           | -0.576 | -0.225 |
| Yield          | 0.447  | 0.605  |
| Testing weight | 0.542  | 0.317  |
| GPC            | -0.400 | -0.525 |
| Zeleny Index   | -0.375 | -0.571 |
| Wet gluten     | -0.373 | -0.587 |
| N Straw        | -0.264 | -0.547 |
| NUE            | 0.987  | 0.126  |
| HMW-GS         | -0.103 | -0.799 |
| LMW-GS         | -0.469 | -0.438 |
| Total-Gli      | -0.096 | 0.618  |

Figure S4. Principal component analysis (PCA, top right) with variable loadings (in bold > |0.4|); bottom) and multigroup discriminant analysis (MDA; top left) under different N fertilization treatments with UAN as foliar fertilizer. In MDA, circles contain 100% of cases.

Table S1. Pearson correlation coefficients among yield and quality parameters in wheat under different foliar N fertilization treatments and conventional soil fertilization in a two-year field trial with UAN and UREA as fertilizers.

|                       | <b>Yield</b> | <b>GPC</b> | <b>Wet gluten</b> | <b>Testing weight</b> | <b>HI</b> | <b>TSW</b> | <b>Zeleny index</b> |
|-----------------------|--------------|------------|-------------------|-----------------------|-----------|------------|---------------------|
| <b>Yield</b>          |              | 0.03 n.s.  | 0.08 n.s.         | 0.26 n.s.             | 0.09 n.s. | 0.03 n.s.  | -0.09 n.s.          |
| <b>GPC</b>            | 0.03 n.s.    |            | 0.97 ***          | -0.15 n.s.            | -0.49 *** | -0.50 ***  | 0.94 ***            |
| <b>Wet gluten</b>     | 0.08 n.s.    | 0.97 ***   |                   | -0.19 n.s.            | -0.58 *** | -0.60 ***  | 0.90 ***            |
| <b>Testing weight</b> | 0.26 n.s.    | -0.15 n.s. | -0.19 n.s.        |                       | 0.60 ***  | 0.65 ***   | -0.23 n.s.          |
| <b>HI</b>             | 0.09 n.s.    | -0.49 ***  | -0.58 ***         | 0.60 ***              |           | 0.92 ***   | -0.51 ***           |
| <b>TSW</b>            | 0.03 n.s.    | -0.50 ***  | -0.60 ***         | 0.65 ***              | 0.92 ***  |            | -0.51 ***           |
| <b>Zeleny index</b>   | -0.09 n.s.   | 0.94 ***   | 0.90 ***          | -0.23 n.s.            | -0.51 *** | -0.51 ***  |                     |

\* Significance at  $P \leq 0.05$ ; \*\* significance at  $P \leq 0.01$ ; \*\*\* significance at  $P \leq 0.001$ ; n.s.: not significant.
